# Supplementary figures and images for: 20(S)-Protopanaxadiol decreases atherosclerosis in ApoE KO mice by increasing the levels of LDLR and inhibiting its binding with PCSK9
Source: Royal Society of Chemistry journal article supplement (doi:10.1039/d2fo00392a), 2022-01-01

## Western Blot Raw Data

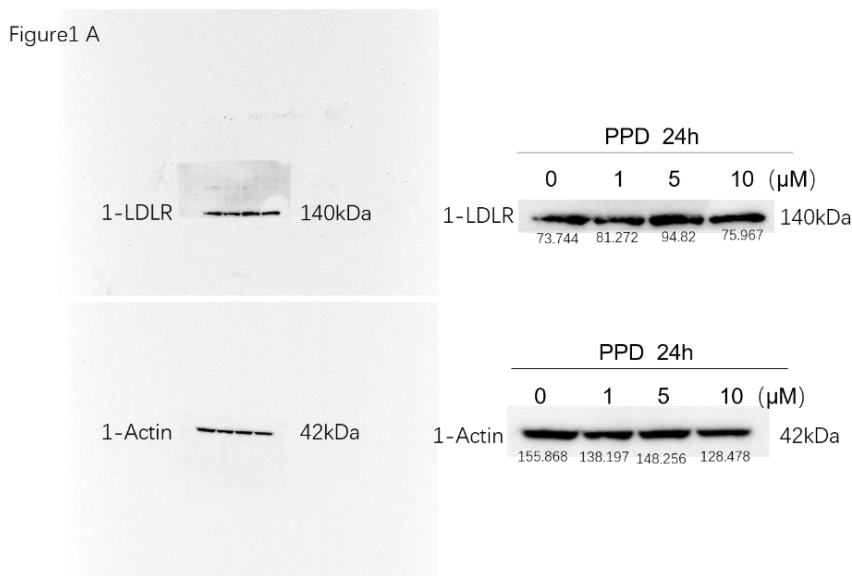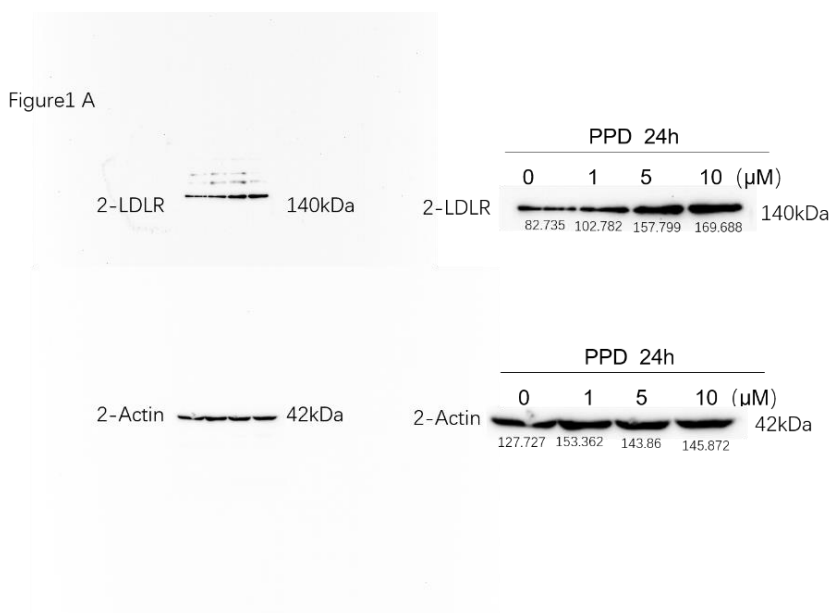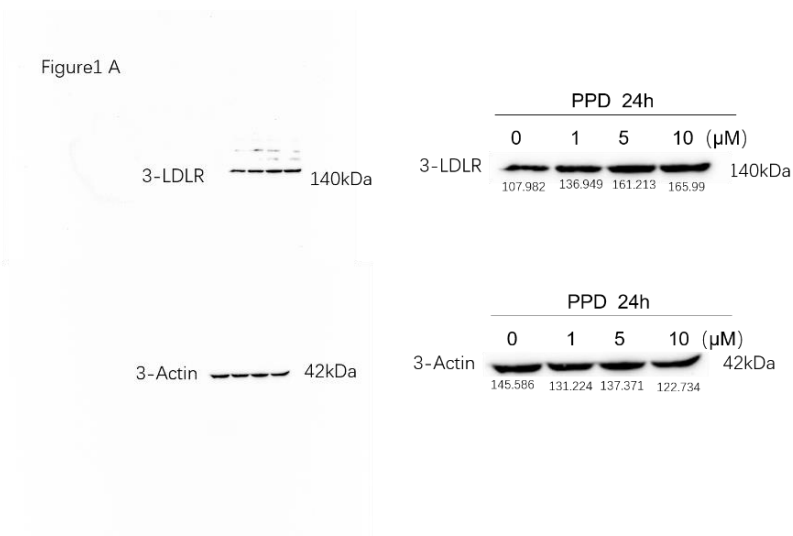

Figure1 B

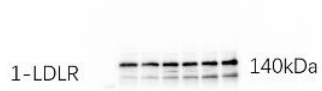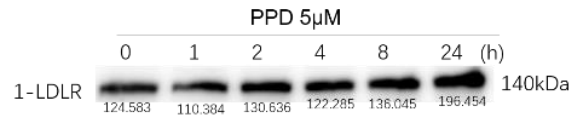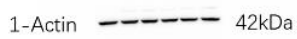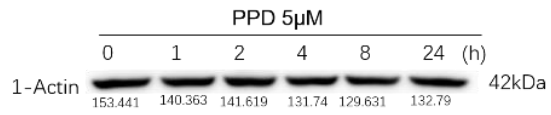

Figure1 B

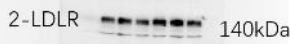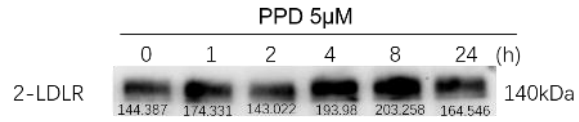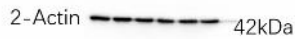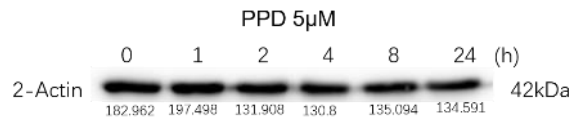

Figure1 B

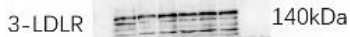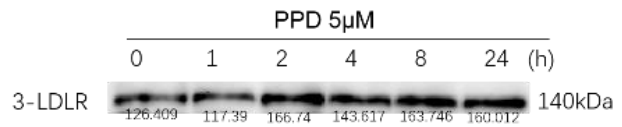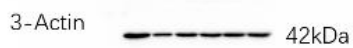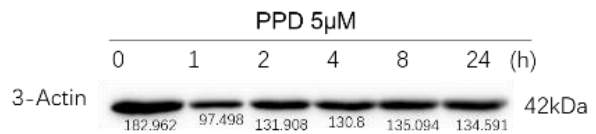

Figure4 C

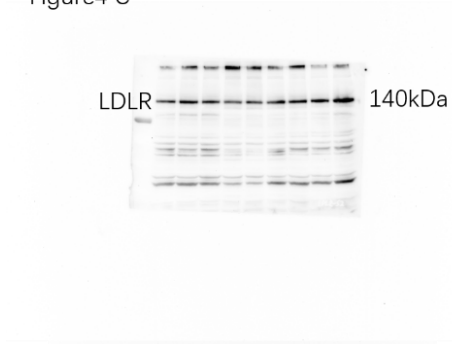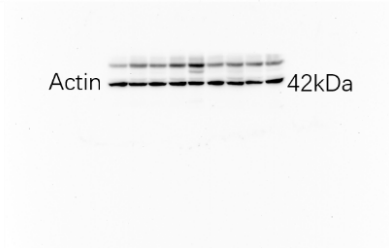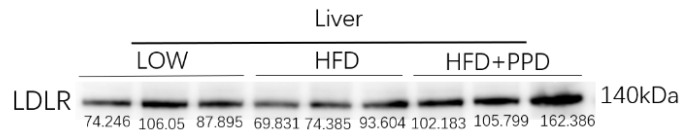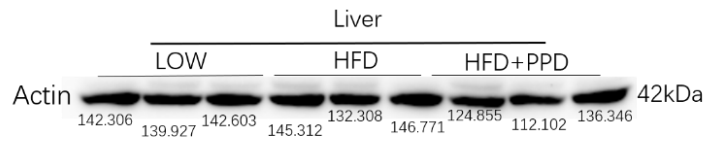

Supplement: d2fo00392a1.pdf [file d2fo00392a1.pdf]
